# Supplementary material
Source: publisher site journal article supplement (https://www.dovepress.com/article/589101)
Supplement: Supplementary file 1 [file 589101%20Supplementary%20Material.docx]

**Supplementary_Material**

**Oxidative stress, glutathione system activity, and Zinc/Selenium imbalance in adult measles of varying severity according to vaccination status**

**Supplementary Table S1. Effect size estimates and sensitivity analysis for between-group comparisons**

| Parameter | Vaccinated (mean ± SD) | Unvaccinated (mean ± SD) | Hedges g | 95% CI | Magnitude |
| --- | --- | --- | --- | --- | --- |
| OMP 356 nm | 1.27 ± 0.30 | 1.47 ± 0.94 | −0.38 | −0.82 to 0.06 | Small |
| OMP 370 nm | 1.08 ± 0.15 | 1.39 ± 0.96 | −0.55 | −1.00 to −0.10 | Moderate |
| OMP 430 nm | 0.50 ± 0.06 | 0.65 ± 0.56 | −0.59 | −1.04 to −0.15 | Moderate |
| OMP 530 nm | 0.10 ± 0.02 | 0.11 ± 0.11 | −0.28 | −0.72 to 0.16 | Small |
| GPx | 0.148 ± 0.026 | 0.140 ± 0.095 | 0.11 | −0.33 to 0.55 | Negligible |
| GR | 0.061 ± 0.020 | 0.048 ± 0.048 | −0.89 | −1.35 to −0.43 | Large |

Notes: Effect sizes are presented as Hedges g with 95% confidence intervals. Negative values

indicate higher levels in unvaccinated patients. Magnitude interpretation follows conventional

thresholds (small »0.2, moderate »0.5, large ³0.8).
